# Supplementary material for: Wnt Signaling Protects against Paclitaxel-Induced Spiral Ganglion Neuron Damage in the Mouse Cochlea In Vitro
Source: Hindawi journal article supplement (doi:10.1155/2019/7878906), 2019-10-07

## Supplementary Figure 1

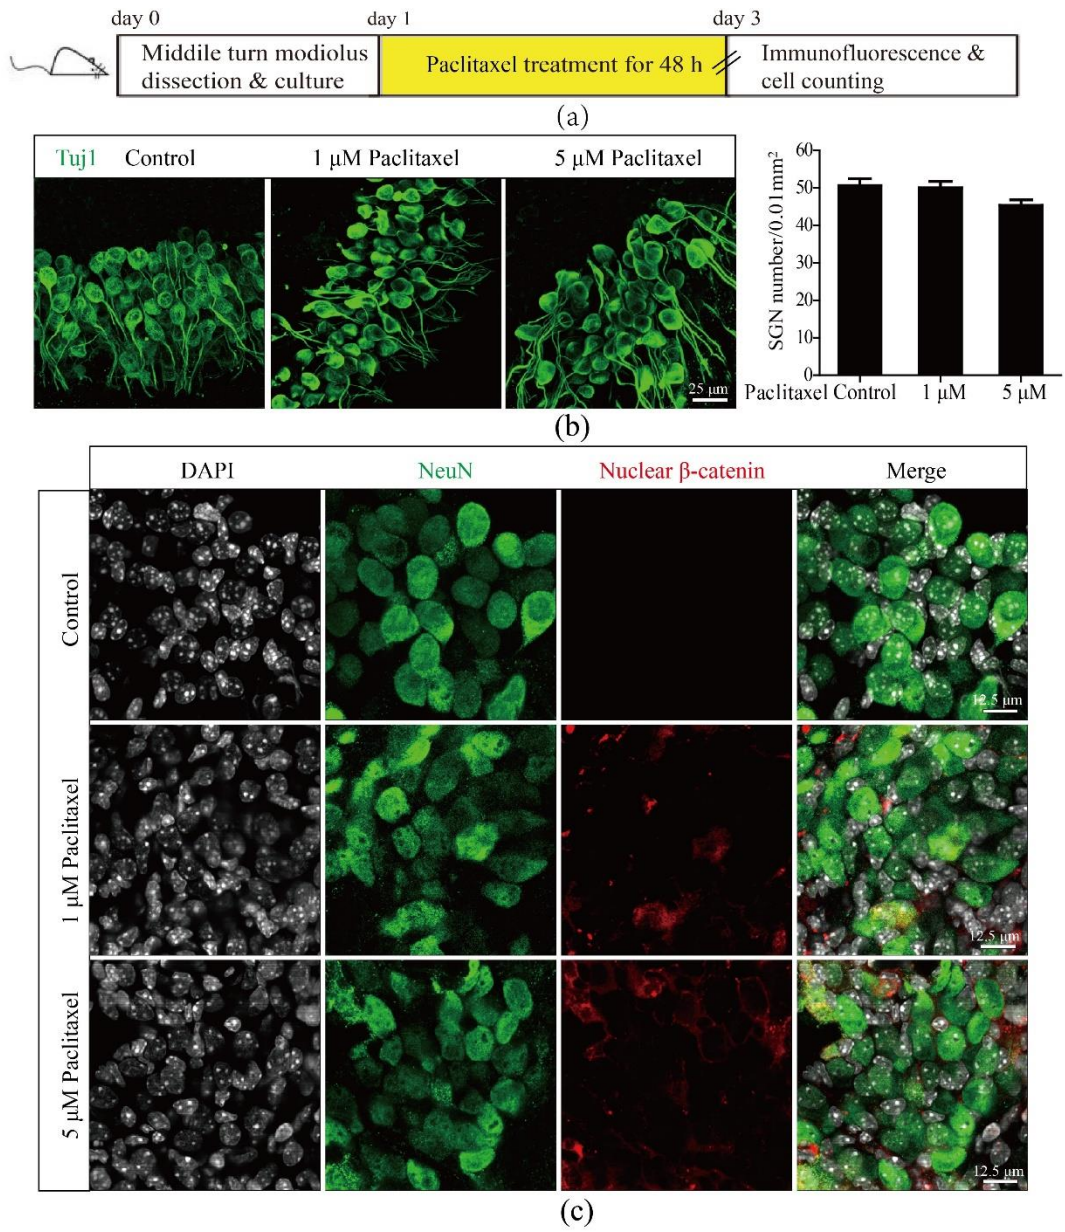

## Supplementary Figure 2

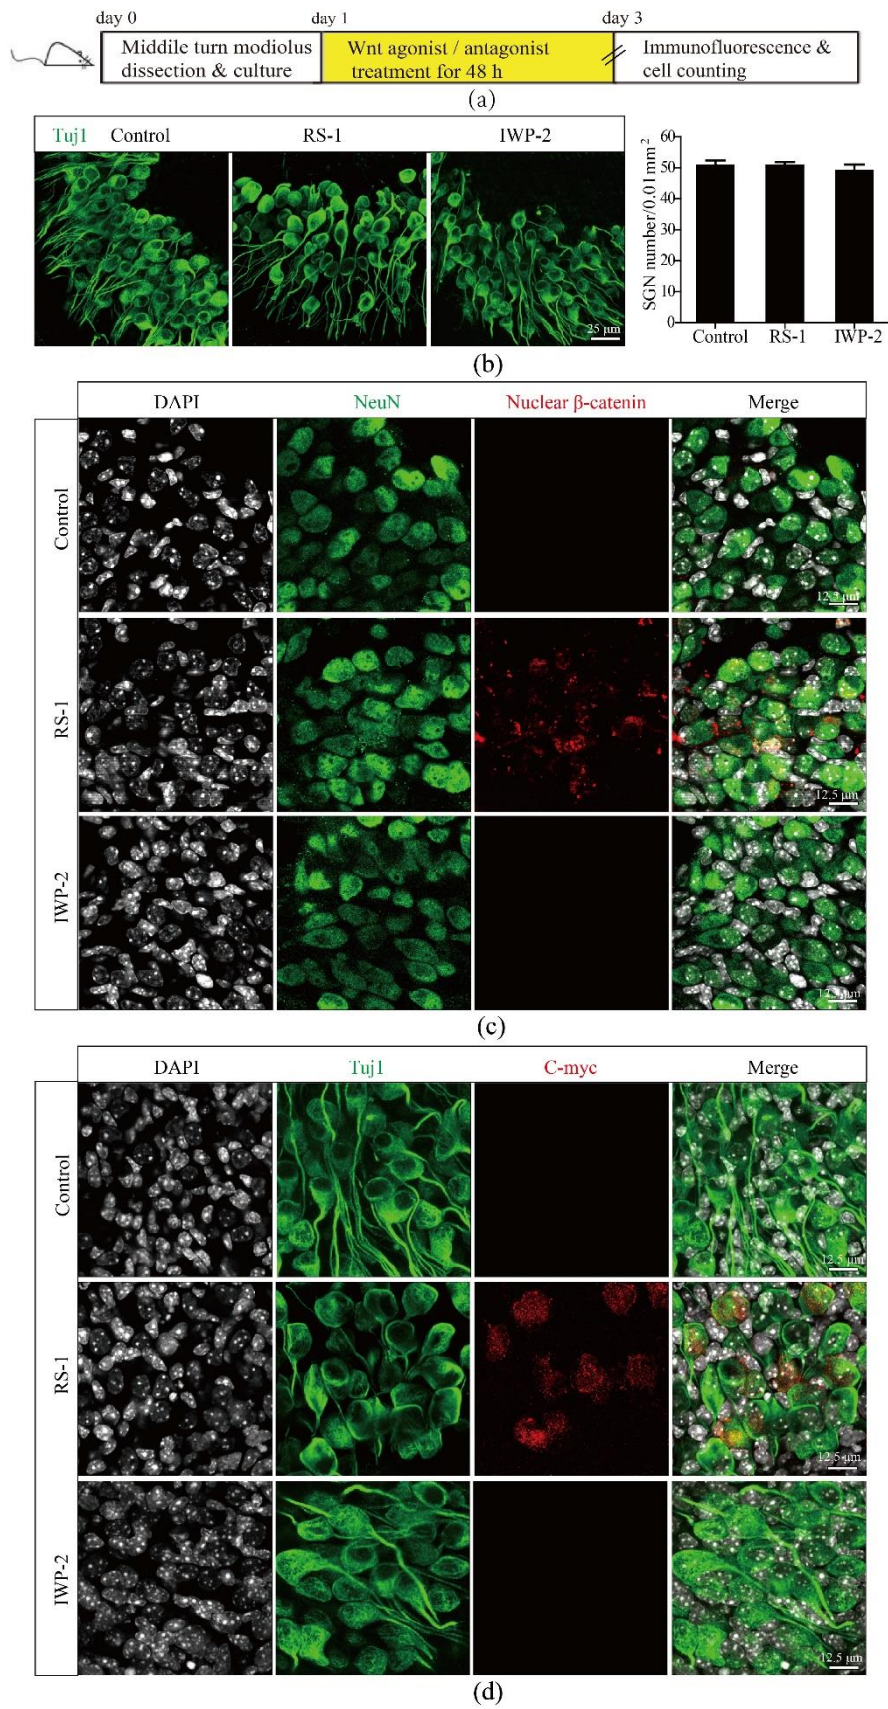

Supplement: f1 [file 7878906.f1.pdf]
